# Supplementary material for: Stationary Waves and Upward Troposphere-Stratosphere Coupling in S2S Models
Source: Copernicus journal article supplement (doi:10.5194/wcd-2021-58), 2021-09-09
Supplement: Supplementary file [file wcd-2021-58-AC1-supplement.pdf]

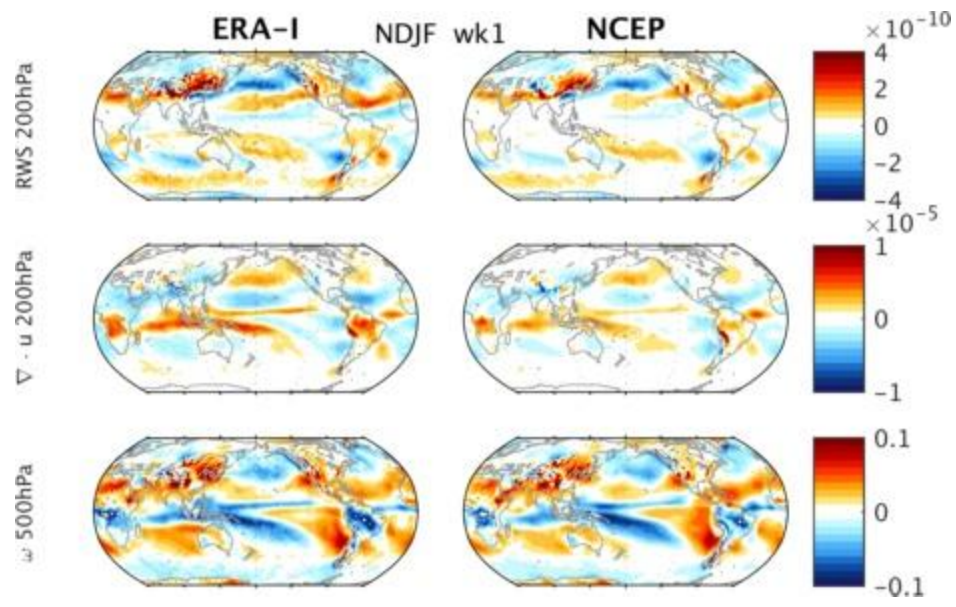

Figure R1. Left column, from top to bottom: week 1 200 hPa Rossby wave source, 200 hPa wind divergence, 500 hPa  $\omega$  during NDJF; right column: same as left column but for the NCEP model
