# Supplementary material for: Stationary Waves and Upward Troposphere-Stratosphere Coupling in S2S Models
Source: Copernicus journal article supplement (doi:10.5194/wcd-2021-58), 2021-09-09

### relationship among biases, week 3 NDJF

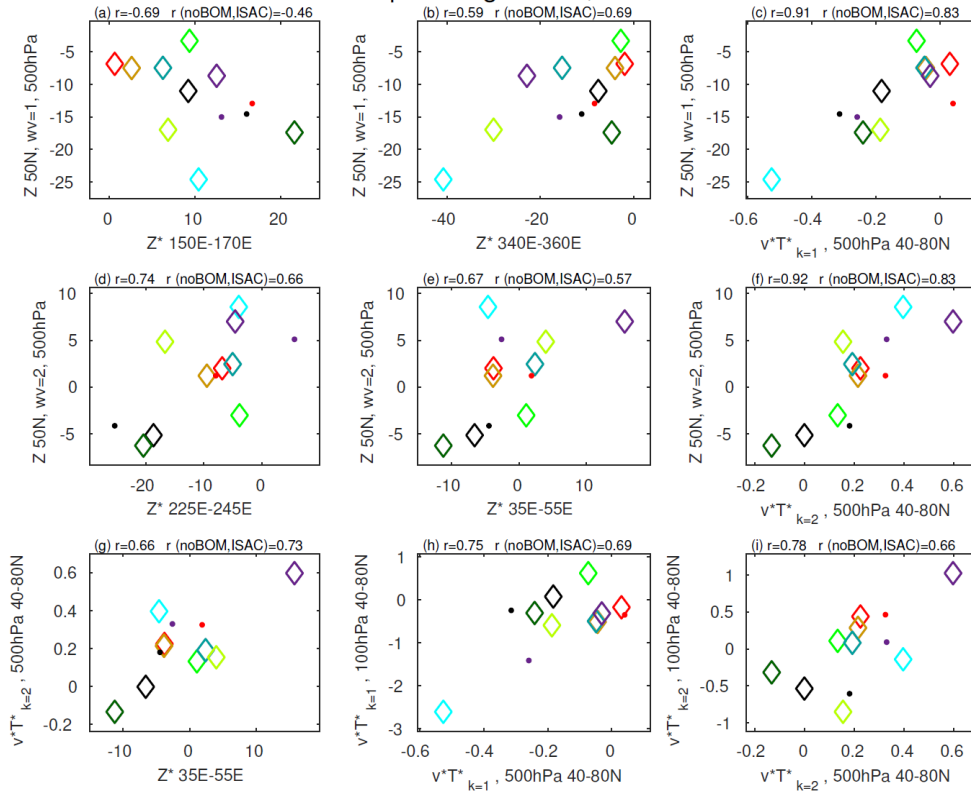

Supplement: Supplementary file [file wcd-2021-58-AC2-supplement.pdf]
